# Supplementary material for: Predator exposure early in life shapes behavioral development and individual variation in a clonal fish
Source: PubMed Central journal article supplement (PMC11408663; doi:10.1038/s41598-024-72550-5), 2024-09-17
Supplement: 41598_2024_72550_MOESM1_ESM.pdf [file 41598_2024_72550_MOESM1_ESM.pdf]

## SUPPLEMENTARY INFORMATION FOR:

### Predator exposure early in life shapes behavioral development and individual variation in a clonal fish

Scherer U<sup>1,2,3\*</sup>, Laskowski KL<sup>3,4</sup>, Kressler MM<sup>3,5</sup>, Ehlman SM<sup>1,2,3</sup>, Wolf M<sup>1,3</sup>, Bierbach D<sup>1,2,3</sup>

<sup>1</sup> SClol Excellence Cluster, Technische Universität Berlin, 10587 Berlin, Germany

<sup>2</sup> Faculty of Life Sciences, Humboldt-Universität zu Berlin, 10117 Berlin, Germany

<sup>3</sup> Department of Fish Biology, Fisheries, and Aquaculture, Leibniz Institute of Freshwater Ecology and  
Inland Fisheries, 12587 Berlin, Germany

<sup>4</sup>Department of Evolution & Ecology, University of California Davis, Davis CA 95616, USA

<sup>5</sup>Centre for Ecology and Conservation, University of Exeter, Penryn, Cornwall, TR10 9FE

\*Corresponding author (u.k.scherer@gmail.com)

**Table S1** Linear mixed-effects models testing if individuals that were forced to forage in the presence of the predator behaved differently over time (regarding their activity, time spent feeding, and visits to the feeding spot) compared individuals in the control treatment. We considered that, possibly, behaviors may develop differently over time in the two treatments by including an interaction term between week and treatment (full models, left), however, if not significant, the interaction term was removed from the models (final models, right). We included random intercepts for both individuals and broods in all models. In cases where brood had no explanatory power, the term was removed from the model.

| Response               | Predictors                                           | Full model        |       |          |          |           | Final model       |       |          |          |           |  |
|------------------------|------------------------------------------------------|-------------------|-------|----------|----------|-----------|-------------------|-------|----------|----------|-----------|--|
|                        |                                                      | Estimate          | SE    | $\chi^2$ | <i>p</i> | <i>df</i> | Estimate          | SE    | $\chi^2$ | <i>p</i> | <i>df</i> |  |
| Feeding duration (%)   | (Intercept)                                          | 0.114             | 0.042 | -        | -        | -         | 0.125             | 0.040 | -        | -        | -         |  |
|                        | Treatment [Predator]                                 | 0.069             | 0.044 | -        | -        | -         | 0.047             | 0.031 | 2.224    | 0.136    | 1         |  |
|                        | Week                                                 | 0.072             | 0.009 | -        | -        | -         | 0.068             | 0.006 | 111.470  | <0.001   | 1         |  |
|                        | Treatment [Predator] × Week                          | -0.009            | 0.012 | 0.519    | 0.472    | 1         | -                 | -     | -        | -        | -         |  |
|                        | <b>Random Effects</b>                                |                   |       |          |          |           |                   |       |          |          |           |  |
|                        | $\sigma^2$                                           | 0.03              |       |          |          |           | 0.03              |       |          |          |           |  |
|                        | $\tau_{00}$                                          | 0.01 Individual   |       |          |          |           | 0.01 Individual   |       |          |          |           |  |
|                        |                                                      | 0.00 Brood        |       |          |          |           | 0.00 Brood        |       |          |          |           |  |
|                        | ICC                                                  | 0.35              |       |          |          |           | 0.35              |       |          |          |           |  |
|                        | <i>N</i>                                             | 47 Individual     |       |          |          |           | 47 Individual     |       |          |          |           |  |
|                        |                                                      | 6 Brood           |       |          |          |           | 6 Brood           |       |          |          |           |  |
|                        | Observations                                         | 559               |       |          |          |           | 559               |       |          |          |           |  |
|                        | Marginal R <sup>2</sup> / Conditional R <sup>2</sup> | 0.138 / 0.438     |       |          |          |           | 0.138 / 0.437     |       |          |          |           |  |
| Visits to feeding spot | (Intercept)                                          | 51.82             | 4.967 | -        | -        | -         | 49.268            | 4.602 | -        | -        | -         |  |
|                        | Treatment [Predator]                                 | -1.41             | 6.404 | -        | -        | -         | 3.797             | 5.141 | 0.542    | 0.462    | 1         |  |
|                        | Week                                                 | 1.55              | 1.073 | -        | -        | -         | 2.578             | 0.768 | 11.143   | 0.001    | 1         |  |
|                        | Treatment [Predator] × Week                          | 2.09              | 1.534 | 1.858    | 0.173    | 1         | -                 | -     | -        | -        | -         |  |
|                        | <b>Random Effects</b>                                |                   |       |          |          |           |                   |       |          |          |           |  |
|                        | $\sigma^2$                                           | 408.60            |       |          |          |           | 410.10            |       |          |          |           |  |
|                        | $\tau_{00}$                                          | 273.37 Individual |       |          |          |           | 273.14 Individual |       |          |          |           |  |
|                        |                                                      | 22.16 Brood       |       |          |          |           | 22.11 Brood       |       |          |          |           |  |
|                        | ICC                                                  | 0.42              |       |          |          |           | 0.42              |       |          |          |           |  |
|                        | <i>N</i>                                             | 47 Individual     |       |          |          |           | 47 Individual     |       |          |          |           |  |
|                        |                                                      | 6 Brood           |       |          |          |           | 6 Brood           |       |          |          |           |  |
|                        | Observations                                         | 559               |       |          |          |           | 559               |       |          |          |           |  |
|                        | Marginal R <sup>2</sup> / Conditional R <sup>2</sup> | 0.018 / 0.430     |       |          |          |           | 0.017 / 0.428     |       |          |          |           |  |
| Activity (cm/sec)      | (Intercept)                                          | 3.189             | 0.178 | -        | -        | -         | 3.074             | 0.156 | -        | -        | -         |  |
|                        | Treatment [Predator]                                 | -0.626            | 0.255 | -        | -        | -         | -0.391            | 0.184 | 4.305    | 0.038    | 1         |  |
|                        | Week                                                 | -0.487            | 0.049 | -        | -        | -         | -0.440            | 0.035 | 135.17   | <0.001   | 1         |  |
|                        | Treatment [Predator] × Week                          | 0.095             | 0.071 | 1.791    | 0.181    | 1         | -                 | -     | -        | -        | -         |  |
|                        | <b>Random Effects</b>                                |                   |       |          |          |           |                   |       |          |          |           |  |
|                        | $\sigma^2$                                           | 0.87              |       |          |          |           | 0.87              |       |          |          |           |  |
|                        | $\tau_{00}$                                          | 0.32 Individual   |       |          |          |           | 0.32 Individual   |       |          |          |           |  |
|                        | ICC                                                  | 0.27              |       |          |          |           | 0.27              |       |          |          |           |  |
|                        | <i>N</i>                                             | 47 Individual     |       |          |          |           | 47 Individual     |       |          |          |           |  |
|                        | Observations                                         | 559               |       |          |          |           | 559               |       |          |          |           |  |
|                        | Marginal R <sup>2</sup> / Conditional R <sup>2</sup> | 0.192 / 0.412     |       |          |          |           | 0.190 / 0.410     |       |          |          |           |  |

**Table S2** Variance components for time spent feeding in the control vs. predator treatment, over the 4 experimental weeks.

| Behavior             | Variance component                       | Week | Control  |          |          | Predator |          |          |
|----------------------|------------------------------------------|------|----------|----------|----------|----------|----------|----------|
|                      |                                          |      | Estimate | Lower CI | Upper CI | Estimate | Lower CI | Upper CI |
| Feeding duration (%) | Repeatability for individual             | 1    | 0.263    | 0.183    | 0.359    | 0.193    | 0.106    | 0.300    |
|                      | Repeatability for Brood                  |      | 0.000    | 0.000    | 0.000    | 0.266    | 0.092    | 0.463    |
|                      | Among-individual variation in intercepts |      | 0.008    | 0.005    | 0.013    | 0.010    | 0.005    | 0.016    |
|                      | Among-individual variation in slopes     |      | 0.003    | 0.002    | 0.005    | 0.001    | 0.001    | 0.002    |
|                      | Among-brood variation in intercepts      |      | 0.000    | 0.000    | 0.000    | 0.014    | 0.004    | 0.032    |
|                      | Within-individual variation              |      | 0.019    | 0.017    | 0.023    | 0.026    | 0.022    | 0.031    |
|                      | Repeatability for individual             | 2    | 0.381    | 0.305    | 0.469    | 0.129    | 0.067    | 0.212    |
|                      | Repeatability for Brood                  |      | 0.000    | 0.000    | 0.000    | 0.255    | 0.098    | 0.454    |
|                      | Among-individual variation in intercepts |      | 0.014    | 0.010    | 0.020    | 0.006    | 0.003    | 0.010    |
|                      | Among-individual variation in slopes     |      | 0.003    | 0.002    | 0.005    | 0.001    | 0.001    | 0.002    |
|                      | Among- brood variation in intercepts     |      | 0.000    | 0.000    | 0.000    | 0.012    | 0.004    | 0.027    |
|                      | Within-individual variation              |      | 0.020    | 0.017    | 0.023    | 0.027    | 0.022    | 0.032    |
|                      | Repeatability for individual             | 3    | 0.555    | 0.467    | 0.641    | 0.109    | 0.059    | 0.184    |
|                      | Repeatability for Brood                  |      | 0.000    | 0.000    | 0.000    | 0.264    | 0.089    | 0.435    |
|                      | Among-individual variation in intercepts |      | 0.028    | 0.020    | 0.041    | 0.005    | 0.003    | 0.008    |
|                      | Among-individual variation in slopes     |      | 0.003    | 0.002    | 0.004    | 0.001    | 0.001    | 0.002    |
|                      | Among- brood variation in intercepts     |      | 0.000    | 0.000    | 0.000    | 0.012    | 0.003    | 0.026    |
|                      | Within-individual variation              |      | 0.019    | 0.017    | 0.023    | 0.026    | 0.023    | 0.032    |
|                      | Repeatability for individual             | 4    | 0.687    | 0.599    | 0.762    | 0.158    | 0.087    | 0.239    |
|                      | Repeatability for Brood                  |      | 0.000    | 0.000    | 0.000    | 0.246    | 0.096    | 0.409    |
|                      | Among-individual variation in intercepts |      | 0.049    | 0.034    | 0.071    | 0.007    | 0.004    | 0.012    |
|                      | Among-individual variation in slopes     |      | 0.003    | 0.002    | 0.003    | 0.001    | 0.001    | 0.002    |
|                      | Among- brood variation in intercepts     |      | 0.000    | 0.000    | 0.000    | 0.011    | 0.004    | 0.024    |
|                      | Within-individual variation              |      | 0.020    | 0.017    | 0.023    | 0.027    | 0.023    | 0.031    |

**Table S3** Variance components for the number of visits to the feeding spot in the control vs. predator treatment, over the 4 experimental weeks.

| Behavior               | Variance component                       | Week | Control  |          |          | Predator |          |          |
|------------------------|------------------------------------------|------|----------|----------|----------|----------|----------|----------|
|                        |                                          |      | Estimate | Lower CI | Upper CI | Estimate | Lower CI | Upper CI |
| Visits to feeding spot | Repeatability for individual             | 1    | 0.563    | 0.442    | 0.661    | 0.280    | 0.159    | 0.410    |
|                        | Repeatability for Brood                  |      | 0.000    | 0.000    | 0.000    | 0.242    | 0.080    | 0.428    |
|                        | Among-individual variation in intercepts |      | 2.807    | 1.772    | 4.310    | 1.015    | 0.562    | 1.635    |
|                        | Among-individual variation in slopes     |      | 0.134    | 0.084    | 0.209    | 0.186    | 0.114    | 0.296    |
|                        | Among-brood variation in intercepts      |      | 0.000    | 0.000    | 0.000    | 0.878    | 0.250    | 1.968    |
|                        | Within-individual variation              |      | 2.039    | 1.737    | 2.420    | 1.526    | 1.293    | 1.828    |
|                        | Repeatability for individual             | 2    | 0.475    | 0.364    | 0.575    | 0.275    | 0.168    | 0.407    |
|                        | Repeatability for Brood                  |      | 0.000    | 0.000    | 0.000    | 0.223    | 0.085    | 0.408    |
|                        | Among-individual variation in intercepts |      | 1.977    | 1.284    | 2.998    | 0.959    | 0.572    | 1.557    |
|                        | Among-individual variation in slopes     |      | 0.144    | 0.086    | 0.232    | 0.185    | 0.108    | 0.299    |
|                        | Among-brood variation in intercepts      |      | 0.000    | 0.000    | 0.000    | 0.769    | 0.258    | 1.771    |
|                        | Within-individual variation              |      | 2.039    | 1.758    | 2.448    | 1.540    | 1.301    | 1.832    |
|                        | Repeatability for individual             | 3    | 0.411    | 0.315    | 0.518    | 0.340    | 0.212    | 0.470    |
|                        | Repeatability for Brood                  |      | 0.000    | 0.000    | 0.000    | 0.201    | 0.071    | 0.374    |
|                        | Among-individual variation in intercepts |      | 1.560    | 1.040    | 2.318    | 1.283    | 0.795    | 2.057    |
|                        | Among-individual variation in slopes     |      | 0.159    | 0.094    | 0.269    | 0.177    | 0.108    | 0.279    |
|                        | Among-brood variation in intercepts      |      | 0.000    | 0.000    | 0.000    | 0.748    | 0.227    | 1.753    |
|                        | Within-individual variation              |      | 2.042    | 1.747    | 2.448    | 1.552    | 1.321    | 1.833    |
|                        | Repeatability for individual             | 4    | 0.404    | 0.291    | 0.512    | 0.453    | 0.321    | 0.571    |
|                        | Repeatability for Brood                  |      | 0.000    | 0.000    | 0.000    | 0.168    | 0.061    | 0.319    |
|                        | Among-individual variation in intercepts |      | 1.497    | 0.926    | 2.271    | 2.086    | 1.252    | 3.082    |
|                        | Among-individual variation in slopes     |      | 0.150    | 0.091    | 0.245    | 0.156    | 0.103    | 0.224    |
|                        | Among-brood variation in intercepts      |      | 0.000    | 0.000    | 0.000    | 0.773    | 0.239    | 1.649    |
|                        | Within-individual variation              |      | 2.048    | 1.741    | 2.425    | 1.548    | 1.294    | 1.841    |

**Table S4** Variance components for activity in the control vs. predator treatment, over the 4 experimental weeks.

| Behavior             | Variance component                       | Week | Control  |          |          | Predator |          |          |
|----------------------|------------------------------------------|------|----------|----------|----------|----------|----------|----------|
|                      |                                          |      | Estimate | Lower CI | Upper CI | Estimate | Lower CI | Upper CI |
| Activity<br>(cm/sec) | Repeatability for individual             | 1    | 0.604    | 0.470    | 0.707    | 0.393    | 0.273    | 0.500    |
|                      | Repeatability for Brood                  |      | 0.021    | 0.005    | 0.059    | 0.000    | 0.000    | 0.000    |
|                      | Among-individual variation in intercepts |      | 1.503    | 0.873    | 2.433    | 0.460    | 0.277    | 0.699    |
|                      | Among-individual variation in slopes     |      | 0.103    | 0.076    | 0.132    | 0.084    | 0.055    | 0.121    |
|                      | Among-brood variation in intercepts      |      | 0.052    | 0.012    | 0.143    | 0.000    | 0.000    | 0.000    |
|                      | Within-individual variation              |      | 0.830    | 0.710    | 0.978    | 0.626    | 0.532    | 0.743    |
|                      | Repeatability for individual             | 2    | 0.448    | 0.328    | 0.567    | 0.261    | 0.181    | 0.340    |
|                      | Repeatability for Brood                  |      | 0.010    | 0.002    | 0.029    | 0.000    | 0.000    | 0.000    |
|                      | Among-individual variation in intercepts |      | 0.778    | 0.485    | 1.267    | 0.256    | 0.159    | 0.388    |
|                      | Among-individual variation in slopes     |      | 0.108    | 0.073    | 0.156    | 0.093    | 0.056    | 0.140    |
|                      | Among-brood variation in intercepts      |      | 0.018    | 0.004    | 0.053    | 0.000    | 0.000    | 0.000    |
|                      | Within-individual variation              |      | 0.829    | 0.712    | 0.977    | 0.634    | 0.533    | 0.750    |
|                      | Repeatability for individual             | 3    | 0.275    | 0.185    | 0.378    | 0.290    | 0.195    | 0.392    |
|                      | Repeatability for Brood                  |      | 0.013    | 0.003    | 0.036    | 0.000    | 0.000    | 0.000    |
|                      | Among-individual variation in intercepts |      | 0.371    | 0.226    | 0.591    | 0.292    | 0.170    | 0.467    |
|                      | Among-individual variation in slopes     |      | 0.126    | 0.077    | 0.193    | 0.089    | 0.056    | 0.138    |
|                      | Among-brood variation in intercepts      |      | 0.017    | 0.005    | 0.051    | 0.000    | 0.000    | 0.000    |
|                      | Within-individual variation              |      | 0.835    | 0.706    | 0.973    | 0.628    | 0.533    | 0.756    |
|                      | Repeatability for individual             | 4    | 0.213    | 0.133    | 0.304    | 0.430    | 0.298    | 0.555    |
|                      | Repeatability for Brood                  |      | 0.013    | 0.003    | 0.032    | 0.000    | 0.000    | 0.000    |
|                      | Among-individual variation in intercepts |      | 0.264    | 0.152    | 0.421    | 0.534    | 0.300    | 0.892    |
|                      | Among-individual variation in slopes     |      | 0.127    | 0.071    | 0.204    | 0.077    | 0.053    | 0.112    |
|                      | Among-brood variation in intercepts      |      | 0.016    | 0.004    | 0.042    | 0.000    | 0.000    | 0.000    |
|                      | Within-individual variation              |      | 0.832    | 0.704    | 0.976    | 0.630    | 0.540    | 0.749    |

**Table S5** Linear mixed-effects models testing if our three target behaviors (activity, feeding duration, visits to feeding spot) predicted each other: activity and feeding duration as well as activity and visits to the feeding spot were positively related to each other but feeding duration and number of visits to the feeding spot did not predict each other; tested for the predator (left models) and control (right models) treatment separately. We included random intercepts for both individuals and broods in all models, however, in cases where brood had no explanatory power, the term was removed from the model.

| Response                                             | Predictors                                           | Predator        |       |          |        |               | Control         |       |          |        |    |
|------------------------------------------------------|------------------------------------------------------|-----------------|-------|----------|--------|---------------|-----------------|-------|----------|--------|----|
|                                                      |                                                      | Estimate        | SE    | $\chi^2$ | p      | df            | Estimate        | SE    | $\chi^2$ | p      | df |
| Activity (cm/sec)                                    | (Intercept)                                          | 2.779           | 0.121 | -        | -      | -             | 3.208           | 0.163 | -        | -      | -  |
|                                                      | Feeding duration (%)                                 | -3.508          | 0.235 | 162.530  | <0.001 | 1             | -4.301          | 0.286 | 164.190  | <0.001 | 1  |
|                                                      | <b>Random Effects</b>                                |                 |       |          |        |               |                 |       |          |        |    |
|                                                      | $\sigma^2$                                           | 0.52            |       |          |        |               | 0.70            |       |          |        |    |
|                                                      | $\tau_{00}$                                          | 0.15 Individual |       |          |        |               | 0.42 Individual |       |          |        |    |
|                                                      | ICC                                                  | 0.22            |       |          |        |               | 0.37            |       |          |        |    |
|                                                      | N                                                    | 23 Individual   |       |          |        |               | 24 Individual   |       |          |        |    |
|                                                      | Observations                                         | 274             |       |          |        |               | 285             |       |          |        |    |
|                                                      | Marginal R <sup>2</sup> / Conditional R <sup>2</sup> | 0.457 / 0.577   |       |          |        |               | 0.428 / 0.643   |       |          |        |    |
| Activity (cm/sec)                                    | (Intercept)                                          | 0.982           | 0.204 | -        | -      | -             | 1.133           | 0.201 | -        | -      | -  |
|                                                      | Visits to feeding spot                               | 0.010           | 0.003 | 10.521   | 0.001  | 1             | 0.015           | 0.003 | 22.216   | <0.001 | 1  |
|                                                      | <b>Random Effects</b>                                |                 |       |          |        |               |                 |       |          |        |    |
|                                                      | $\sigma^2$                                           | 0.94            |       |          |        |               | 1.25            |       |          |        |    |
|                                                      | $\tau_{00}$                                          | 0.10 Individual |       |          |        |               | 0.21 Individual |       |          |        |    |
|                                                      |                                                      | 0.04 Brood      |       |          |        |               |                 |       |          |        |    |
|                                                      | ICC                                                  | 0.13            |       |          |        |               | 0.14            |       |          |        |    |
|                                                      | N                                                    | 23 Individual   |       |          |        |               | 24 Individual   |       |          |        |    |
|                                                      |                                                      | 6 Brood         |       |          |        |               |                 |       |          |        |    |
| Observations                                         | 274                                                  |                 |       |          |        | 285           |                 |       |          |        |    |
| Marginal R <sup>2</sup> / Conditional R <sup>2</sup> | 0.063 / 0.189                                        |                 |       |          |        | 0.098 / 0.227 |                 |       |          |        |    |
| Feeding duration (%)                                 | (Intercept)                                          | 0.329           | 0.054 | -        | -      | -             | 0.269           | 0.044 | -        | -      | -  |
|                                                      | Visits to feeding spot                               | 0.001           | 0.001 | 1.160    | 0.281  | 1             | 0.000           | 0.000 | 0.371    | 0.543  | 1  |
|                                                      | <b>Random Effects</b>                                |                 |       |          |        |               |                 |       |          |        |    |
|                                                      | $\sigma^2$                                           | 0.03            |       |          |        |               | 0.03            |       |          |        |    |
|                                                      | $\tau_{00}$                                          | 0.00 Individual |       |          |        |               | 0.01 Individual |       |          |        |    |
|                                                      |                                                      | 0.01 Brood      |       |          |        |               | 0.00 Brood      |       |          |        |    |
|                                                      | ICC                                                  | 0.28            |       |          |        |               | 0.33            |       |          |        |    |
|                                                      | N                                                    | 23 Individual   |       |          |        |               | 24 Individual   |       |          |        |    |
|                                                      |                                                      | 6 Brood         |       |          |        |               | 6 Brood         |       |          |        |    |
| Observations                                         | 274                                                  |                 |       |          |        | 285           |                 |       |          |        |    |
| Marginal R <sup>2</sup> / Conditional R <sup>2</sup> | 0.005 / 0.287                                        |                 |       |          |        | 0.001 / 0.327 |                 |       |          |        |    |

**Table S6** Linear mixed-effects models testing for body size differences between treatments and over time. We built a linear mixed model with approximated body sizes (detected blob size during tracking with Ethovision) as response and treatment (control vs. predator), trial number (trial 1 vs. trial 12), and the treatment-trial interaction term as fixed effects. Individual and brood ID were included as random terms. Body size approximations are smaller than actual fish sizes

|                                                                     |                                                      | Full model      |       |          |       |    | Final model     |       |          |        |    |  |
|---------------------------------------------------------------------|------------------------------------------------------|-----------------|-------|----------|-------|----|-----------------|-------|----------|--------|----|--|
| Response                                                            | Predictors                                           | Estimate        | SE    | $\chi^2$ | p     | df | Estimate        | SE    | $\chi^2$ | p      | df |  |
| Body size approximation (detected blob size during tracking, in cm) | (Intercept)                                          | 0.726           | 0.015 | -        | -     | -  | 0.727           | 0.014 | -        | -      | -  |  |
|                                                                     | Treatment [Predator]                                 | 0.024           | 0.014 | -        | -     | -  | 0.021           | 0.012 | 3.072    | 0.081  | 1  |  |
|                                                                     | Trial [End]                                          | 0.102           | 0.009 | -        | -     | -  | 0.099           | 0.007 | 87.624   | <0.001 | 1  |  |
|                                                                     | Treatment [Predator] × Trial [End]                   | -0.005          | 0.013 | 0.120    | 0.729 | 1  | -               | -     | -        | -      | -  |  |
|                                                                     | <b>Random Effects</b>                                |                 |       |          |       |    |                 |       |          |        |    |  |
|                                                                     | $\sigma^2$                                           | 0.00            |       |          |       |    | 0.00            |       |          |        |    |  |
|                                                                     | $\tau_{00}$                                          | 0.00 Individual |       |          |       |    | 0.00 Individual |       |          |        |    |  |
|                                                                     |                                                      | 0.00 Brood      |       |          |       |    | 0.00 Brood      |       |          |        |    |  |
|                                                                     | ICC                                                  | 0.63            |       |          |       |    | 0.63            |       |          |        |    |  |
|                                                                     | N                                                    | 48 Individual   |       |          |       |    | 48 Individual   |       |          |        |    |  |
|                                                                     |                                                      | 7 Brood         |       |          |       |    | 7 Brood         |       |          |        |    |  |
|                                                                     | Observations                                         | 96              |       |          |       |    | 96              |       |          |        |    |  |
|                                                                     | Marginal R <sup>2</sup> / Conditional R <sup>2</sup> | 0.477 / 0.809   |       |          |       |    | 0.477 / 0.808   |       |          |        |    |  |

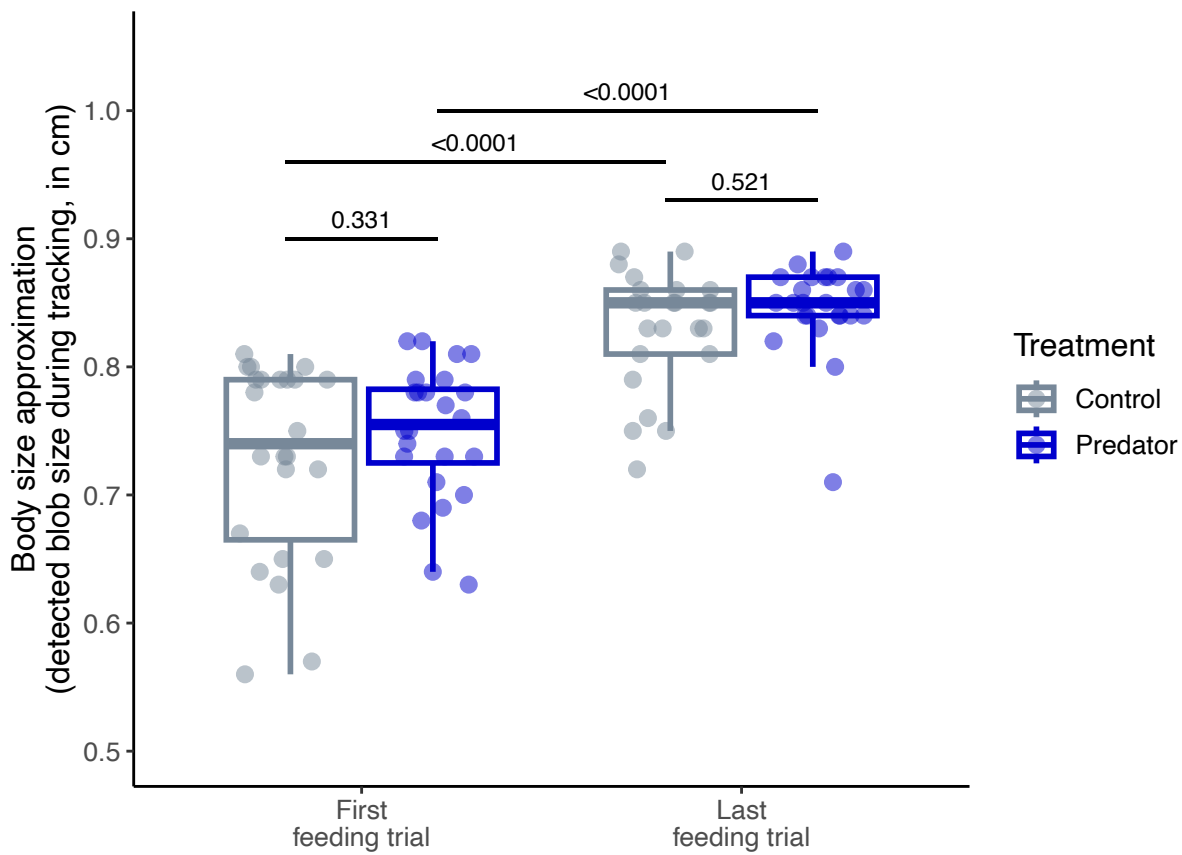

**Figure S1.** Body sizes of Amazon mollies at the beginning and end of the experiment. Body sizes were approximated from the size of detected blobs during tracking with Ethovision. Thus, body size approximations are smaller than actual fish sizes. There was no difference in body size between individuals from the control vs. predator treatment at the beginning and at the end of the experiment, but individuals in both treatments grew over time. Depicted boxplots show raw data (points), medians (horizontal lines), 25 and 75% quantiles (boxes) and 1.5 x interquartile ranges (whiskers). P-values were calculated from a pairwise post-hoc comparison of the full model (including the interaction term, see Table S6) via estimated marginal means and Tukey adjustment).
